# Supplementary material for: Evolution of the EKA family of powdery mildew avirulence-effector genes from the ORF 1 of a LINE retrotransposon
Source: PubMed Central journal article supplement (PMC4641428; doi:10.1186/s12864-015-2185-x), 2015-11-10
Supplement: 12864_2015_2185_MOESM1_ESM.pdf [file 12864_2015_2185_MOESM1_ESM.pdf]

AVRa10 .....  
Satine AATTTCGAGAAGCCCCAATTTGCCATGCCACCCCTTTTATCCATCTCACCCCTTGGAGAA

AVRa10 670 680 690 700 710 720  
Satine GCGACCCGTAATCCCGATGACCAATTCTCTGGGAATTTCAAAGGCTCGCACCTCTCCCG  
GCGACCCGATCCCGATGACCTCTCTCTGGGAATTTCAAAGGCTCGCACCTCTCCCG

AVRa10 .....  
Satine CGAATCGAATTCGAAATTTGTTGCCATGGCGGGATTTCTAAAATGCCFCGACGCGTAAA

AVRa10 730 740 750 760 770 780  
Satine CTCAGAACCACCTGGGGACTGTCCAGAGGACACCAAAGTCAGGGCCCAAGCT  
CTCAGAACCACCTGGGGACTGTCCAGAGGACACCAAAGTCAGGGCCCAAGCT

AVRa10 .....  
Satine ACGCAAAAATCCGGATCAGCGGAATCACCAGAGATGGCGTCATCAAAACCTACCAATGC

AVRa10 790 800 810 820 830 840  
Satine CCTGCAAAATGCACTCGGTTTCGGCTGCCCATCTGCCAGGAAACAGAGAAGAGCCG  
CCTGCAAAATGCACTCGGTTTCGGCTGCCCATCTGCCAGGAAACAGAGAAGAGCCG

AVRa10 10 20 30 40 50 60  
Satine ACTCCAGCCATTCAAAAACCCGCGAAGAACATGCAACAAAGAAAGGACTCGACTCCAAT  
ACTCCAGCCATTCAAAAACCCGCGAAGAACATGCAACAAAGAAAGGACTCGACTCCAAT

AVRa10 850  
Satine GCAGCATCAACAACAGCACTCGAAGATGACCGAATCTTTCTGCGTCTTGATGCAAAACCA  
GCAGCATCAACAACAGCACTCGAAGATGACCGAATCTTTCTGCGTCTTGATGCAAAACCA

AVRa10 70 80 90 100 110 120  
Satine CTTCAAAAATGAACTCATGGGGCCCGCTCCAAAGCAGAGAGAAAGATGCTCCCGGAC  
CTTCAAAAATGAACTCATGGGGCCCGCTCCAAAGCAGAGAGAAAGATGCTCCCGGAC

AVRa10 .....  
Satine GAGTGGAGACAGCTCTCTCCAGCTGGCTCCCGAAGCCGTCGCTAAACAAACAAATTCG

AVRa10 130 140 150 160 170 180  
Satine CTAGATATGGTGGACCGCAAGCTCGAGAAGCTAAAACCTCGCGGATTCATTTGGCA  
CTAGATATGGTGGACCGCAAGCTCGAGAAGCTAAAACCTCGCGGATTCATTTGGCA

AVRa10 .....  
Satine ACCCTGCTGATGTGACAGGTTGCAACGCGTTCCTCACTGGCTTTGCCATCGTGCCAAA

AVRa10 190 200 210 220 230 240  
Satine FCCTCGAGCCCAAGAGTCAGAGGAGCTTTGGATCCAGCGGATCCCCCAAAAAGC  
FCCTCGAGCCCAAGAGTCAGAGGAGCTTTGGATCCAGCGGATCCCCCAAAAAGC

AVRa10 .....  
Satine AACCCTGATGCAAAAATCGACTGCTGGAGGCCCTCAGCACCTTCACACAAGTGGAGCA

AVRa10 250 260 270 280 290 300  
Satine CTGCTCGACCCCGAAGCGCGTCCGGTCCAGCACTACCGCGACCCTAGAAGTGAGC  
CTGCTCGACCCCGAAGCGCGTCCGGTCCAGCACTACCGCGACCCTAGAAGTGAGC

AVRa10 .....  
Satine AAATAGAACCCAAAGTGATGATTTCCCTCCGGATCGCAAGCTTCAGTCCGCGTG

AVRa10 310 320 330 340 350 360  
Satine CCCACGAAAGGGCCGACATACCCACAGCCAGGCAAGGAGGCAAAAAGCTTTCGCTC  
CCCACGAAAGGGCCGACATACCCACAGCCAGGCAAGGAGGCAAAAAGCTTTCGCTC

AVRa10 .....  
Satine TTCAGTTAGAAGGACAGTGGAAATCACTGCGGAAATGGTGGCCGCGAAATCTTTAGA

AVRa10 370 380 390 400 410 420  
Satine GACCAACCGCCATACGACCAAGAGCAGGCAAGCAAAAAATATCCCGCCGAAATG  
GACCAACCGCCATACGACCAAGAGCAGGCAAGCAAAAAATATCCCGCCGAAATG

AVRa10 .....  
Satine GTAACCAAGTTGCACTCCAGACCGAGTAAAGATACAGGAAAAAACAATAGCTCGCGCTCC

AVRa10 430 440 450 460 470 480  
Satine CTGGCAGCGATCGAAGCGGAGCGGAGGGCAAGGCAAAAAGTCCGCAATTCACATA  
CTGGCAGCGATCGAAGCGGAGCGGAGGGCAAGGCAAAAAGTCCGCAATTCACATA

AVRa10 .....  
Satine CACAGATCTCGTGGCTTTGTTTCCAGGAACGCTAGCCAAAGCCTGGATTCGCACT

AVRa10 490 500 510 520 530 540  
Satine FCCTCGAGCCCAATGACACTCTCGAGGCACTTTCAAGCCCTCCACCGGTGAAGAC  
FCCTCGAGCCCAATGACACTCTCGAGGCACTTTCAAGCCCTCCACCGGTGAAGAC

AVRa10 .....  
Satine TTCAGGACTCAGGAATAGCAACCATCCAAGAAACCGCCCTCCATACAGCAATGTAGG

AVRa10 550 560 570 580 590 600  
Satine AAAAAATTTGTAGACTCCATCAAAGTCTACTTGGAGCAAGCAATCCGCGCAATTCGTGGC  
AAAAAATTTGTAGACTCCATCAAAGTCTACTTGGAGCAAGCAATCCGCGCAATTCGTGGC

AVRa10 .....  
Satine CGATGCTCGTTCACAGCCACCGCTGGGTGTTCTCGCGCCGACGCTGCTGGAATCTG

AVRa10 610 620 630 640 650 660  
Satine CCCCCTCCGACACCCGCTCCCGAGTCCCTCCAAAGCCCAAGTCTCGGGAATCCGCT  
CCCCCTCCGACACCCGCTCCCGAGTCCCTCCAAAGCCCAAGTCTCGGGAATCCGCT

AVRa10 .....  
Satine GGATCCACCATGCACTCGGATTCGAGTGTAAAGCAGCCCTC
